# Supplementary material
Source: PubMed Central journal article supplement (PMC2914346)
Supplement: NIHMS211399-supplement-1_si_001.pdf [file NIHMS211399-supplement-1_si_001.pdf]

# Supporting Information:

## A Non-Orthogonal Block-Localized Effective Hamiltonian Approach for Chemical and Enzymatic Reactions

Alessandro Cembran, Apirak Payaka, Yen-lin Lin, Wangshen Xie,

Yirong Mo,\* Lingchun Song,\* and Jiali Gao\*

Department of Chemistry, Digital Technology Center and Supercomputing Institute,  
University of Minnesota, Minneapolis, MN 55455

And

Department of Chemistry, Western Michigan University  
Kalamazoo, Michigan 49008

The structures of the Reactant, Transition State, and Product obtained using the different methods are here reported. Notice that at the semiempirical level two minima for the reactant state were found and are here reported: one “in-plane” and another “below” the flavin ring.

**S1.1** Structures optimized with the standard AM1 in the SQUANTM module of CHARMM, no MOV B calculations performed here (cyan triangles in Figure 1 of main text).

```
* #####  
* # SQUANTM - REACTANT IN-PLANE #  
* #####  
*
```

```
39  
1 1 FADN C1 -0.04966 -0.24362 0.22769 SOLU 1 0.00000  
2 1 FADN C2 0.03486 -0.32282 1.60294 SOLU 1 0.00000  
3 1 FADN C3 1.30025 -0.20761 2.24936 SOLU 1 0.00000  
4 1 FADN C4 2.48759 -0.04156 1.44595 SOLU 1 0.00000  
5 1 FADN C5 2.35501 0.06532 0.04282 SOLU 1 0.00000  
6 1 FADN C6 1.10407 -0.03890 -0.54567 SOLU 1 0.00000  
7 1 FADN C7 3.78659 0.07479 3.46762 SOLU 1 0.00000  
8 1 FADN C8 2.52020 -0.09408 4.22119 SOLU 1 0.00000  
9 1 FADN C9 2.57739 -0.10172 5.72658 SOLU 1 0.00000  
10 1 FADN C10 5.01295 0.27316 5.59538 SOLU 1 0.00000  
11 1 FADN H11 -1.03317 -0.33103 -0.26790 SOLU 1 0.00000  
12 1 FADN H12 -0.87872 -0.46472 2.21656 SOLU 1 0.00000  
13 1 FADN H13 3.22521 0.25185 -0.60712 SOLU 1 0.00000  
14 1 FADN H14 1.01459 0.04658 -1.64387 SOLU 1 0.00000  
15 1 FADN O15 1.58961 -0.26037 6.44413 SOLU 1 0.00000  
16 1 FADN O16 6.12450 0.44749 6.11039 SOLU 1 0.00000  
17 1 FADN N17 3.83629 0.08466 6.31085 SOLU 1 0.00000  
18 1 FADN H18 3.90718 0.08884 7.31364 SOLU 1 0.00000
```

|    |   |          |          |          |         |        |         |
|----|---|----------|----------|----------|---------|--------|---------|
| 19 | 1 | FADN N19 | 4.95217  | 0.26897  | 4.15694 | SOLU 1 | 0.00000 |
| 20 | 1 | FADN H20 | 5.83311  | 0.41603  | 3.69756 | SOLU 1 | 0.00000 |
| 21 | 1 | FADN N21 | 3.74117  | 0.02259  | 2.09269 | SOLU 1 | 0.00000 |
| 22 | 1 | FADN N22 | 1.35639  | -0.24366 | 3.62694 | SOLU 1 | 0.00000 |
| 23 | 1 | FADN C23 | 4.96482  | 0.03597  | 1.30895 | SOLU 1 | 0.00000 |
| 24 | 1 | FADN H24 | 5.31296  | 1.09522  | 1.16715 | SOLU 1 | 0.00000 |
| 25 | 1 | FADN H25 | 5.76605  | -0.57225 | 1.81200 | SOLU 1 | 0.00000 |
| 26 | 1 | FADN H26 | 4.78927  | -0.43963 | 0.30585 | SOLU 1 | 0.00000 |
| 27 | 1 | FADN H27 | -1.59090 | 0.39473  | 4.04229 | SOLU 1 | 0.00000 |
| 28 | 1 | FADN C28 | -2.67811 | 0.62986  | 4.19321 | SOLU 1 | 0.00000 |
| 29 | 1 | FADN H29 | -2.83325 | 1.72825  | 4.03138 | SOLU 1 | 0.00000 |
| 30 | 1 | FADN H30 | -2.95757 | 0.38339  | 5.25322 | SOLU 1 | 0.00000 |
| 31 | 1 | FADN N31 | -3.42703 | -0.12141 | 3.20801 | SOLU 1 | 0.00000 |
| 32 | 1 | FADN C32 | -4.76240 | 0.39420  | 2.99389 | SOLU 1 | 0.00000 |
| 33 | 1 | FADN H33 | -4.69180 | 1.46920  | 2.68270 | SOLU 1 | 0.00000 |
| 34 | 1 | FADN H34 | -5.24875 | -0.18821 | 2.16808 | SOLU 1 | 0.00000 |
| 35 | 1 | FADN H35 | -5.41376 | 0.32851  | 3.90769 | SOLU 1 | 0.00000 |
| 36 | 1 | FADN C36 | -3.41486 | -1.54417 | 3.47449 | SOLU 1 | 0.00000 |
| 37 | 1 | FADN H37 | -3.91830 | -2.07814 | 2.62670 | SOLU 1 | 0.00000 |
| 38 | 1 | FADN H38 | -2.35036 | -1.89131 | 3.54124 | SOLU 1 | 0.00000 |
| 39 | 1 | FADN H39 | -3.93709 | -1.82214 | 4.43068 | SOLU 1 | 0.00000 |

\* #####  
 \* # SQUANTM - REACTANT BELOW #  
 \* #####  
 \*

|    |   |          |          |          |           |        |         |
|----|---|----------|----------|----------|-----------|--------|---------|
| 39 |   |          |          |          |           |        |         |
| 1  | 1 | FADN C1  | 3.65154  | -1.93744 | 10.98315  | SOLU 1 | 0.00000 |
| 2  | 1 | FADN C2  | 2.48194  | -1.28382 | 11.31139  | SOLU 1 | 0.00000 |
| 3  | 1 | FADN C3  | 1.62090  | -0.79831 | 10.28461  | SOLU 1 | 0.00000 |
| 4  | 1 | FADN C4  | 2.00304  | -0.97305 | 8.90525   | SOLU 1 | 0.00000 |
| 5  | 1 | FADN C5  | 3.19394  | -1.67625 | 8.60926   | SOLU 1 | 0.00000 |
| 6  | 1 | FADN C6  | 3.99808  | -2.14176 | 9.63718   | SOLU 1 | 0.00000 |
| 7  | 1 | FADN C7  | -0.05458 | 0.08594  | 8.24677   | SOLU 1 | 0.00000 |
| 8  | 1 | FADN C8  | -0.37542 | 0.22546  | 9.68931   | SOLU 1 | 0.00000 |
| 9  | 1 | FADN C9  | -1.68233 | 0.87009  | 10.07406  | SOLU 1 | 0.00000 |
| 10 | 1 | FADN C10 | -2.22854 | 1.09741  | 7.67816   | SOLU 1 | 0.00000 |
| 11 | 1 | FADN H11 | 4.31836  | -2.31139 | 11.78019  | SOLU 1 | 0.00000 |
| 12 | 1 | FADN H12 | 2.19347  | -1.13414 | 12.36887  | SOLU 1 | 0.00000 |
| 13 | 1 | FADN H13 | 3.49754  | -1.88609 | 7.57071   | SOLU 1 | 0.00000 |
| 14 | 1 | FADN H14 | 4.92690  | -2.68863 | 9.39252   | SOLU 1 | 0.00000 |
| 15 | 1 | FADN O15 | -2.02912 | 1.05972  | 11.23966  | SOLU 1 | 0.00000 |
| 16 | 1 | FADN O16 | -2.97447 | 1.43489  | 6.75067   | SOLU 1 | 0.00000 |
| 17 | 1 | FADN N17 | -2.52419 | 1.26228  | 9.02597   | SOLU 1 | 0.00000 |
| 18 | 1 | FADN H18 | -3.40608 | 1.69022  | 9.25001   | SOLU 1 | 0.00000 |
| 19 | 1 | FADN N19 | -0.97136 | 0.49301  | 7.31784   | SOLU 1 | 0.00000 |
| 20 | 1 | FADN H20 | -0.81837 | 0.39729  | 6.32963   | SOLU 1 | 0.00000 |
| 21 | 1 | FADN N21 | 1.16614  | -0.44670 | 7.89719   | SOLU 1 | 0.00000 |
| 22 | 1 | FADN N22 | 0.43718  | -0.18364 | 10.63818  | SOLU 1 | 0.00000 |
| 23 | 1 | FADN C23 | 1.59389  | -0.47234 | 6.50850   | SOLU 1 | 0.00000 |
| 24 | 1 | FADN H24 | 1.15573  | -1.37002 | 5.99313   | SOLU 1 | 0.00000 |
| 25 | 1 | FADN H25 | 1.28258  | 0.47001  | 5.97922   | SOLU 1 | 0.00000 |
| 26 | 1 | FADN H26 | 2.71538  | -0.51373 | 6.44752   | SOLU 1 | 0.00000 |
| 27 | 1 | FADN H27 | -2.17099 | -2.16262 | -13.17438 | SOLU 1 | 0.00000 |
| 28 | 1 | FADN C28 | -2.29308 | -2.25522 | -14.28899 | SOLU 1 | 0.00000 |
| 29 | 1 | FADN H29 | -1.46470 | -2.89931 | -14.68448 | SOLU 1 | 0.00000 |
| 30 | 1 | FADN H30 | -2.20219 | -1.23339 | -14.74191 | SOLU 1 | 0.00000 |

|    |   |      |     |          |          |           |      |   |         |
|----|---|------|-----|----------|----------|-----------|------|---|---------|
| 31 | 1 | FADN | N31 | -3.56027 | -2.82926 | -14.67872 | SOLU | 1 | 0.00000 |
| 32 | 1 | FADN | C32 | -3.71310 | -4.20291 | -14.25784 | SOLU | 1 | 0.00000 |
| 33 | 1 | FADN | H33 | -2.85513 | -4.80366 | -14.65846 | SOLU | 1 | 0.00000 |
| 34 | 1 | FADN | H34 | -3.74168 | -4.32463 | -13.13975 | SOLU | 1 | 0.00000 |
| 35 | 1 | FADN | H35 | -4.66735 | -4.60985 | -14.68366 | SOLU | 1 | 0.00000 |
| 36 | 1 | FADN | C36 | -4.68968 | -2.00003 | -14.32618 | SOLU | 1 | 0.00000 |
| 37 | 1 | FADN | H37 | -4.82544 | -1.88287 | -13.21549 | SOLU | 1 | 0.00000 |
| 38 | 1 | FADN | H38 | -4.54825 | -0.98250 | -14.77575 | SOLU | 1 | 0.00000 |
| 39 | 1 | FADN | H39 | -5.62204 | -2.45518 | -14.75166 | SOLU | 1 | 0.00000 |

```

* #####
* # SQUANTM - TS (RC = -0.020) #
* #####
*

```

|    |   |      |     |          |          |          |      |   |         |
|----|---|------|-----|----------|----------|----------|------|---|---------|
| 39 |   |      |     |          |          |          |      |   |         |
| 1  | 1 | FADN | C1  | 3.28653  | -1.61239 | 1.92869  | SOLU | 1 | 0.00000 |
| 2  | 1 | FADN | C2  | 2.32017  | -0.75982 | 1.42849  | SOLU | 1 | 0.00000 |
| 3  | 1 | FADN | C3  | 0.96032  | -0.90577 | 1.80873  | SOLU | 1 | 0.00000 |
| 4  | 1 | FADN | C4  | 0.59969  | -1.96949 | 2.69960  | SOLU | 1 | 0.00000 |
| 5  | 1 | FADN | C5  | 1.61328  | -2.81368 | 3.20789  | SOLU | 1 | 0.00000 |
| 6  | 1 | FADN | C6  | 2.93207  | -2.63411 | 2.81912  | SOLU | 1 | 0.00000 |
| 7  | 1 | FADN | C7  | -1.65093 | -1.12213 | 2.73885  | SOLU | 1 | 0.00000 |
| 8  | 1 | FADN | C8  | -1.24653 | -0.10147 | 1.80364  | SOLU | 1 | 0.00000 |
| 9  | 1 | FADN | C9  | -2.26552 | 0.85670  | 1.29956  | SOLU | 1 | 0.00000 |
| 10 | 1 | FADN | C10 | -3.84897 | -0.03780 | 2.95184  | SOLU | 1 | 0.00000 |
| 11 | 1 | FADN | H11 | 4.34207  | -1.48282 | 1.63611  | SOLU | 1 | 0.00000 |
| 12 | 1 | FADN | H12 | 2.60226  | 0.05578  | 0.73953  | SOLU | 1 | 0.00000 |
| 13 | 1 | FADN | H13 | 1.38405  | -3.61300 | 3.93092  | SOLU | 1 | 0.00000 |
| 14 | 1 | FADN | H14 | 3.71292  | -3.30021 | 3.22547  | SOLU | 1 | 0.00000 |
| 15 | 1 | FADN | O15 | -2.09029 | 1.58902  | 0.31434  | SOLU | 1 | 0.00000 |
| 16 | 1 | FADN | O16 | -4.93689 | -0.02557 | 3.54714  | SOLU | 1 | 0.00000 |
| 17 | 1 | FADN | N17 | -3.49880 | 0.87863  | 1.96188  | SOLU | 1 | 0.00000 |
| 18 | 1 | FADN | H18 | -4.17890 | 1.57268  | 1.71592  | SOLU | 1 | 0.00000 |
| 19 | 1 | FADN | N19 | -2.91281 | -1.06451 | 3.29246  | SOLU | 1 | 0.00000 |
| 20 | 1 | FADN | H20 | -3.21261 | -1.70034 | 4.00628  | SOLU | 1 | 0.00000 |
| 21 | 1 | FADN | N21 | -0.75305 | -2.12236 | 3.07950  | SOLU | 1 | 0.00000 |
| 22 | 1 | FADN | N22 | 0.03205  | 0.04012  | 1.34149  | SOLU | 1 | 0.00000 |
| 23 | 1 | FADN | C23 | -1.15510 | -3.24554 | 3.89896  | SOLU | 1 | 0.00000 |
| 24 | 1 | FADN | H24 | -1.06595 | -2.98554 | 4.98842  | SOLU | 1 | 0.00000 |
| 25 | 1 | FADN | H25 | -2.21023 | -3.55268 | 3.66353  | SOLU | 1 | 0.00000 |
| 26 | 1 | FADN | H26 | -0.50474 | -4.13347 | 3.67101  | SOLU | 1 | 0.00000 |
| 27 | 1 | FADN | H27 | 0.01873  | -0.00116 | -0.00778 | SOLU | 1 | 0.00000 |
| 28 | 1 | FADN | C28 | 0.00618  | -0.03825 | -1.33717 | SOLU | 1 | 0.00000 |
| 29 | 1 | FADN | H29 | 1.08803  | -0.24606 | -1.52120 | SOLU | 1 | 0.00000 |
| 30 | 1 | FADN | H30 | -0.31857 | 1.01647  | -1.52565 | SOLU | 1 | 0.00000 |
| 31 | 1 | FADN | N31 | -0.86703 | -1.00506 | -1.75403 | SOLU | 1 | 0.00000 |
| 32 | 1 | FADN | C32 | -0.43258 | -2.34871 | -2.01714 | SOLU | 1 | 0.00000 |
| 33 | 1 | FADN | H33 | 0.68089  | -2.43612 | -1.91504 | SOLU | 1 | 0.00000 |
| 34 | 1 | FADN | H34 | -0.92283 | -3.05579 | -1.29366 | SOLU | 1 | 0.00000 |
| 35 | 1 | FADN | H35 | -0.72631 | -2.64852 | -3.06051 | SOLU | 1 | 0.00000 |
| 36 | 1 | FADN | C36 | -2.21993 | -0.66991 | -2.11082 | SOLU | 1 | 0.00000 |
| 37 | 1 | FADN | H37 | -2.89973 | -1.52450 | -1.85059 | SOLU | 1 | 0.00000 |
| 38 | 1 | FADN | H38 | -2.54941 | 0.25184  | -1.55766 | SOLU | 1 | 0.00000 |
| 39 | 1 | FADN | H39 | -2.29321 | -0.47683 | -3.21643 | SOLU | 1 | 0.00000 |

```

* #####
* # SQUANTM - PRODUCT #

```

```

* #####
*
39
1 1 FADN C1 3.10280 -2.50070 2.02178 SOLU 1 0.00000
2 1 FADN C2 2.16254 -1.63101 1.47163 SOLU 1 0.00000
3 1 FADN C3 0.94363 -1.39458 2.12414 SOLU 1 0.00000
4 1 FADN C4 0.66792 -2.07132 3.35753 SOLU 1 0.00000
5 1 FADN C5 1.62012 -2.96277 3.87549 SOLU 1 0.00000
6 1 FADN C6 2.83040 -3.16494 3.21210 SOLU 1 0.00000
7 1 FADN C7 -1.60172 -1.27778 3.28036 SOLU 1 0.00000
8 1 FADN C8 -1.32606 -0.69427 2.03349 SOLU 1 0.00000
9 1 FADN C9 -2.40869 -0.30424 1.13489 SOLU 1 0.00000
10 1 FADN C10 -3.98545 -0.84357 2.93571 SOLU 1 0.00000
11 1 FADN H11 4.06361 -2.65895 1.50807 SOLU 1 0.00000
12 1 FADN H12 2.39482 -1.10911 0.53173 SOLU 1 0.00000
13 1 FADN H13 1.42112 -3.51646 4.80731 SOLU 1 0.00000
14 1 FADN H14 3.57024 -3.85902 3.64087 SOLU 1 0.00000
15 1 FADN O15 -2.22362 0.05544 -0.05857 SOLU 1 0.00000
16 1 FADN O16 -5.14689 -0.86463 3.38149 SOLU 1 0.00000
17 1 FADN N17 -3.70428 -0.36778 1.64165 SOLU 1 0.00000
18 1 FADN H18 -4.47912 -0.06107 1.09174 SOLU 1 0.00000
19 1 FADN N19 -2.91983 -1.31738 3.73339 SOLU 1 0.00000
20 1 FADN H20 -3.15781 -1.70659 4.62204 SOLU 1 0.00000
21 1 FADN N21 -0.57563 -1.87394 4.02274 SOLU 1 0.00000
22 1 FADN N22 0.01944 -0.42837 1.64232 SOLU 1 0.00000
23 1 FADN C23 -0.63974 -1.90973 5.46088 SOLU 1 0.00000
24 1 FADN H24 -1.18444 -1.01391 5.86507 SOLU 1 0.00000
25 1 FADN H25 -1.17167 -2.84527 5.78531 SOLU 1 0.00000
26 1 FADN H26 0.39617 -1.91016 5.89488 SOLU 1 0.00000
27 1 FADN H27 0.01760 -0.28804 0.64668 SOLU 1 0.00000
28 1 FADN C28 -0.00811 0.08065 -1.89586 SOLU 1 0.00000
29 1 FADN H29 1.03119 -0.30633 -1.85982 SOLU 1 0.00000
30 1 FADN H30 -0.33452 0.82618 -1.13074 SOLU 1 0.00000
31 1 FADN N31 -0.84901 -0.33175 -2.79683 SOLU 1 0.00000
32 1 FADN C32 -0.49318 -1.31532 -3.81026 SOLU 1 0.00000
33 1 FADN H33 0.55005 -1.69753 -3.64974 SOLU 1 0.00000
34 1 FADN H34 -1.21892 -2.17292 -3.75491 SOLU 1 0.00000
35 1 FADN H35 -0.56393 -0.83577 -4.82539 SOLU 1 0.00000
36 1 FADN C36 -2.22882 0.14160 -2.84824 SOLU 1 0.00000
37 1 FADN H37 -2.89944 -0.67786 -2.46726 SOLU 1 0.00000
38 1 FADN H38 -2.36353 1.03993 -2.18414 SOLU 1 0.00000
39 1 FADN H39 -2.48898 0.39686 -3.90985 SOLU 1 0.00000

```

**S1.2** AM1-MOVb optimized structures with the free energy perturbation method. A reference potential  $V_{RP}(\lambda)$  was used to drive the reaction, with  $\lambda$  being a coupling parameter linearly connecting the reactant and product potentials (see Figure 5 in the main text).

```

* #####
* # MOVb PERT (Emix Driven) - REACTANT IN-PLANE #
* #####
*
39
1 1 FADN C1 0.06471 -0.26826 0.03909 SOLU 1 0.00000
2 1 FADN C2 0.09297 -0.36171 1.41576 SOLU 1 0.00000
3 1 FADN C3 1.32813 -0.23305 2.11609 SOLU 1 0.00000
4 1 FADN C4 2.54477 -0.03830 1.36483 SOLU 1 0.00000
5 1 FADN C5 2.46914 0.08288 -0.04148 SOLU 1 0.00000

```

|    |   |          |          |          |          |        |         |
|----|---|----------|----------|----------|----------|--------|---------|
| 6  | 1 | FADN C6  | 1.24600  | -0.03532 | -0.68305 | SOLU 1 | 0.00000 |
| 7  | 1 | FADN C7  | 3.75706  | 0.07546  | 3.43983  | SOLU 1 | 0.00000 |
| 8  | 1 | FADN C8  | 2.46344  | -0.12283 | 4.13817  | SOLU 1 | 0.00000 |
| 9  | 1 | FADN C9  | 2.45856  | -0.14732 | 5.64454  | SOLU 1 | 0.00000 |
| 10 | 1 | FADN C10 | 4.89084  | 0.26886  | 5.61880  | SOLU 1 | 0.00000 |
| 11 | 1 | FADN H11 | -0.89501 | -0.36713 | -0.49896 | SOLU 1 | 0.00000 |
| 12 | 1 | FADN H12 | -0.84149 | -0.52692 | 1.98726  | SOLU 1 | 0.00000 |
| 13 | 1 | FADN H13 | 3.36249  | 0.29148  | -0.65217 | SOLU 1 | 0.00000 |
| 14 | 1 | FADN H14 | 1.20087  | 0.06123  | -1.78307 | SOLU 1 | 0.00000 |
| 15 | 1 | FADN O15 | 1.44484  | -0.33058 | 6.31869  | SOLU 1 | 0.00000 |
| 16 | 1 | FADN O16 | 5.97707  | 0.45529  | 6.18129  | SOLU 1 | 0.00000 |
| 17 | 1 | FADN N17 | 3.68892  | 0.05277  | 6.28258  | SOLU 1 | 0.00000 |
| 18 | 1 | FADN H18 | 3.71820  | 0.04621  | 7.28745  | SOLU 1 | 0.00000 |
| 19 | 1 | FADN N19 | 4.88962  | 0.28058  | 4.17902  | SOLU 1 | 0.00000 |
| 20 | 1 | FADN H20 | 5.78627  | 0.44729  | 3.75834  | SOLU 1 | 0.00000 |
| 21 | 1 | FADN N21 | 3.76933  | 0.03858  | 2.06371  | SOLU 1 | 0.00000 |
| 22 | 1 | FADN N22 | 1.32790  | -0.28428 | 3.49453  | SOLU 1 | 0.00000 |
| 23 | 1 | FADN C23 | 5.02382  | 0.08079  | 1.33137  | SOLU 1 | 0.00000 |
| 24 | 1 | FADN H24 | 5.35877  | 1.14725  | 1.21382  | SOLU 1 | 0.00000 |
| 25 | 1 | FADN H25 | 5.81431  | -0.51849 | 1.86137  | SOLU 1 | 0.00000 |
| 26 | 1 | FADN H26 | 4.89806  | -0.38789 | 0.31758  | SOLU 1 | 0.00000 |
| 27 | 1 | FADN H27 | -1.57410 | 0.38722  | 4.04868  | SOLU 1 | 0.00000 |
| 28 | 1 | FADN C28 | -2.64906 | 0.63550  | 4.25124  | SOLU 1 | 0.00000 |
| 29 | 1 | FADN H29 | -2.80471 | 1.73022  | 4.06641  | SOLU 1 | 0.00000 |
| 30 | 1 | FADN H30 | -2.87371 | 0.42222  | 5.33124  | SOLU 1 | 0.00000 |
| 31 | 1 | FADN N31 | -3.45184 | -0.14008 | 3.32932  | SOLU 1 | 0.00000 |
| 32 | 1 | FADN C32 | -4.77566 | 0.40850  | 3.12567  | SOLU 1 | 0.00000 |
| 33 | 1 | FADN H33 | -4.67989 | 1.46123  | 2.75149  | SOLU 1 | 0.00000 |
| 34 | 1 | FADN H34 | -5.30646 | -0.20222 | 2.34914  | SOLU 1 | 0.00000 |
| 35 | 1 | FADN H35 | -5.40037 | 0.41680  | 4.06020  | SOLU 1 | 0.00000 |
| 36 | 1 | FADN C36 | -3.48000 | -1.54637 | 3.67166  | SOLU 1 | 0.00000 |
| 37 | 1 | FADN H37 | -4.00714 | -2.10801 | 2.85677  | SOLU 1 | 0.00000 |
| 38 | 1 | FADN H38 | -2.42695 | -1.92324 | 3.75035  | SOLU 1 | 0.00000 |
| 39 | 1 | FADN H39 | -4.00321 | -1.75612 | 4.64466  | SOLU 1 | 0.00000 |

\* #####  
 \* # MOV B PERT (Emix Driven) - REACTANT BELOW #  
 \* #####  
 \*

|    |   |          |          |          |         |        |         |
|----|---|----------|----------|----------|---------|--------|---------|
| 39 |   |          |          |          |         |        |         |
| 1  | 1 | FADN C1  | 3.35499  | -1.46294 | 2.63010 | SOLU 1 | 0.00000 |
| 2  | 1 | FADN C2  | 2.44196  | -0.47008 | 2.34117 | SOLU 1 | 0.00000 |
| 3  | 1 | FADN C3  | 1.05990  | -0.66186 | 2.63195 | SOLU 1 | 0.00000 |
| 4  | 1 | FADN C4  | 0.62836  | -1.91380 | 3.20256 | SOLU 1 | 0.00000 |
| 5  | 1 | FADN C5  | 1.59900  | -2.89442 | 3.51346 | SOLU 1 | 0.00000 |
| 6  | 1 | FADN C6  | 2.93445  | -2.66445 | 3.22425 | SOLU 1 | 0.00000 |
| 7  | 1 | FADN C7  | -1.62007 | -1.05974 | 3.26533 | SOLU 1 | 0.00000 |
| 8  | 1 | FADN C8  | -1.09548 | 0.19837  | 2.67770 | SOLU 1 | 0.00000 |
| 9  | 1 | FADN C9  | -2.06135 | 1.32593  | 2.41840 | SOLU 1 | 0.00000 |
| 10 | 1 | FADN C10 | -3.86866 | -0.05739 | 3.37260 | SOLU 1 | 0.00000 |
| 11 | 1 | FADN H11 | 4.42527  | -1.31320 | 2.40241 | SOLU 1 | 0.00000 |
| 12 | 1 | FADN H12 | 2.76762  | 0.48572  | 1.88924 | SOLU 1 | 0.00000 |
| 13 | 1 | FADN H13 | 1.32519  | -3.84268 | 4.00401 | SOLU 1 | 0.00000 |
| 14 | 1 | FADN H14 | 3.68292  | -3.43940 | 3.47098 | SOLU 1 | 0.00000 |
| 15 | 1 | FADN O15 | -1.73449 | 2.39625  | 1.90605 | SOLU 1 | 0.00000 |
| 16 | 1 | FADN O16 | -5.04356 | -0.24467 | 3.71177 | SOLU 1 | 0.00000 |
| 17 | 1 | FADN N17 | -3.39401 | 1.11252  | 2.79178 | SOLU 1 | 0.00000 |

|    |   |          |          |          |          |        |         |
|----|---|----------|----------|----------|----------|--------|---------|
| 18 | 1 | FADN H18 | -4.06179 | 1.84839  | 2.63815  | SOLU 1 | 0.00000 |
| 19 | 1 | FADN N19 | -2.94261 | -1.13661 | 3.60323  | SOLU 1 | 0.00000 |
| 20 | 1 | FADN H20 | -3.34507 | -1.95270 | 4.02885  | SOLU 1 | 0.00000 |
| 21 | 1 | FADN N21 | -0.74883 | -2.11107 | 3.44347  | SOLU 1 | 0.00000 |
| 22 | 1 | FADN N22 | 0.17206  | 0.36143  | 2.36991  | SOLU 1 | 0.00000 |
| 23 | 1 | FADN C23 | -1.23363 | -3.41067 | 3.87722  | SOLU 1 | 0.00000 |
| 24 | 1 | FADN H24 | -1.33599 | -3.42318 | 4.99652  | SOLU 1 | 0.00000 |
| 25 | 1 | FADN H25 | -2.22117 | -3.64809 | 3.39405  | SOLU 1 | 0.00000 |
| 26 | 1 | FADN H26 | -0.52179 | -4.21871 | 3.55551  | SOLU 1 | 0.00000 |
| 27 | 1 | FADN H27 | -0.00546 | 0.00099  | -1.67644 | SOLU 1 | 0.00000 |
| 28 | 1 | FADN C28 | -0.05465 | -0.09889 | -2.79684 | SOLU 1 | 0.00000 |
| 29 | 1 | FADN H29 | 0.98076  | -0.29437 | -3.18103 | SOLU 1 | 0.00000 |
| 30 | 1 | FADN H30 | -0.41922 | 0.87208  | -3.22364 | SOLU 1 | 0.00000 |
| 31 | 1 | FADN N31 | -0.92545 | -1.16261 | -3.23357 | SOLU 1 | 0.00000 |
| 32 | 1 | FADN C32 | -0.47046 | -2.47578 | -2.84938 | SOLU 1 | 0.00000 |
| 33 | 1 | FADN H33 | 0.57791  | -2.62250 | -3.21982 | SOLU 1 | 0.00000 |
| 34 | 1 | FADN H34 | -0.47925 | -2.64002 | -1.73515 | SOLU 1 | 0.00000 |
| 35 | 1 | FADN H35 | -1.13179 | -3.24640 | -3.32548 | SOLU 1 | 0.00000 |
| 36 | 1 | FADN C36 | -2.31842 | -0.92587 | -2.94413 | SOLU 1 | 0.00000 |
| 37 | 1 | FADN H37 | -2.54598 | -0.91457 | -1.84136 | SOLU 1 | 0.00000 |
| 38 | 1 | FADN H38 | -2.61916 | 0.06378  | -3.37778 | SOLU 1 | 0.00000 |
| 39 | 1 | FADN H39 | -2.93377 | -1.73122 | -3.42439 | SOLU 1 | 0.00000 |

```

* #####
* # MOVB PERT (Emix Driven) - TS (Ro = 0.44, Rc = -0.020) #
* #####
*

```

|    |   |          |          |          |          |        |         |
|----|---|----------|----------|----------|----------|--------|---------|
| 39 |   |          |          |          |          |        |         |
| 1  | 1 | FADN C1  | 3.26304  | -1.63546 | 1.88011  | SOLU 1 | 0.00000 |
| 2  | 1 | FADN C2  | 2.29997  | -0.77370 | 1.38939  | SOLU 1 | 0.00000 |
| 3  | 1 | FADN C3  | 0.94034  | -0.91537 | 1.77372  | SOLU 1 | 0.00000 |
| 4  | 1 | FADN C4  | 0.57937  | -1.97825 | 2.66947  | SOLU 1 | 0.00000 |
| 5  | 1 | FADN C5  | 1.59122  | -2.82857 | 3.16985  | SOLU 1 | 0.00000 |
| 6  | 1 | FADN C6  | 2.90814  | -2.65696 | 2.77070  | SOLU 1 | 0.00000 |
| 7  | 1 | FADN C7  | -1.66656 | -1.11811 | 2.71824  | SOLU 1 | 0.00000 |
| 8  | 1 | FADN C8  | -1.25870 | -0.09604 | 1.78012  | SOLU 1 | 0.00000 |
| 9  | 1 | FADN C9  | -2.26357 | 0.90409  | 1.32245  | SOLU 1 | 0.00000 |
| 10 | 1 | FADN C10 | -3.85887 | -0.02660 | 2.94864  | SOLU 1 | 0.00000 |
| 11 | 1 | FADN H11 | 4.31742  | -1.51323 | 1.57988  | SOLU 1 | 0.00000 |
| 12 | 1 | FADN H12 | 2.58295  | 0.04587  | 0.70544  | SOLU 1 | 0.00000 |
| 13 | 1 | FADN H13 | 1.36276  | -3.62618 | 3.89496  | SOLU 1 | 0.00000 |
| 14 | 1 | FADN H14 | 3.68748  | -3.32932 | 3.16963  | SOLU 1 | 0.00000 |
| 15 | 1 | FADN O15 | -2.07977 | 1.69000  | 0.38298  | SOLU 1 | 0.00000 |
| 16 | 1 | FADN O16 | -4.95113 | -0.02533 | 3.53635  | SOLU 1 | 0.00000 |
| 17 | 1 | FADN N17 | -3.49906 | 0.91061  | 1.98287  | SOLU 1 | 0.00000 |
| 18 | 1 | FADN H18 | -4.17202 | 1.61898  | 1.75771  | SOLU 1 | 0.00000 |
| 19 | 1 | FADN N19 | -2.92725 | -1.06166 | 3.27403  | SOLU 1 | 0.00000 |
| 20 | 1 | FADN H20 | -3.23159 | -1.70902 | 3.97557  | SOLU 1 | 0.00000 |
| 21 | 1 | FADN N21 | -0.77281 | -2.12556 | 3.05012  | SOLU 1 | 0.00000 |
| 22 | 1 | FADN N22 | 0.00968  | 0.01692  | 1.30221  | SOLU 1 | 0.00000 |
| 23 | 1 | FADN C23 | -1.18328 | -3.25491 | 3.85680  | SOLU 1 | 0.00000 |
| 24 | 1 | FADN H24 | -1.11509 | -2.99996 | 4.94914  | SOLU 1 | 0.00000 |
| 25 | 1 | FADN H25 | -2.23287 | -3.56519 | 3.60044  | SOLU 1 | 0.00000 |
| 26 | 1 | FADN H26 | -0.52529 | -4.13933 | 3.63730  | SOLU 1 | 0.00000 |
| 27 | 1 | FADN H27 | 0.00478  | 0.00947  | -0.01441 | SOLU 1 | 0.00000 |
| 28 | 1 | FADN C28 | 0.00196  | 0.00784  | -1.31146 | SOLU 1 | 0.00000 |
| 29 | 1 | FADN H29 | 1.09853  | -0.15500 | -1.45133 | SOLU 1 | 0.00000 |

|    |   |          |          |          |          |        |         |
|----|---|----------|----------|----------|----------|--------|---------|
| 30 | 1 | FADN H30 | -0.36267 | 1.05828  | -1.44343 | SOLU 1 | 0.00000 |
| 31 | 1 | FADN N31 | -0.80922 | -0.97211 | -1.79117 | SOLU 1 | 0.00000 |
| 32 | 1 | FADN C32 | -0.33683 | -2.31689 | -1.97845 | SOLU 1 | 0.00000 |
| 33 | 1 | FADN H33 | 0.78485  | -2.34793 | -1.97746 | SOLU 1 | 0.00000 |
| 34 | 1 | FADN H34 | -0.71972 | -2.98341 | -1.15629 | SOLU 1 | 0.00000 |
| 35 | 1 | FADN H35 | -0.71232 | -2.71479 | -2.96085 | SOLU 1 | 0.00000 |
| 36 | 1 | FADN C36 | -2.20311 | -0.73422 | -2.05835 | SOLU 1 | 0.00000 |
| 37 | 1 | FADN H37 | -2.83851 | -1.41505 | -1.42779 | SOLU 1 | 0.00000 |
| 38 | 1 | FADN H38 | -2.47429 | 0.33232  | -1.83433 | SOLU 1 | 0.00000 |
| 39 | 1 | FADN H39 | -2.41968 | -0.94862 | -3.14115 | SOLU 1 | 0.00000 |

```
* #####
* # MOVb PERT (Emix Driven) - PRODUCT #
* #####
*
```

|    |   |          |          |          |          |        |         |
|----|---|----------|----------|----------|----------|--------|---------|
| 39 |   |          |          |          |          |        |         |
| 1  | 1 | FADN C1  | 3.15746  | -2.41090 | 2.06574  | SOLU 1 | 0.00000 |
| 2  | 1 | FADN C2  | 2.19747  | -1.57399 | 1.49914  | SOLU 1 | 0.00000 |
| 3  | 1 | FADN C3  | 0.95894  | -1.38077 | 2.12903  | SOLU 1 | 0.00000 |
| 4  | 1 | FADN C4  | 0.68613  | -2.06650 | 3.35784  | SOLU 1 | 0.00000 |
| 5  | 1 | FADN C5  | 1.65894  | -2.92569 | 3.89204  | SOLU 1 | 0.00000 |
| 6  | 1 | FADN C6  | 2.88696  | -3.08596 | 3.25033  | SOLU 1 | 0.00000 |
| 7  | 1 | FADN C7  | -1.60571 | -1.34312 | 3.24600  | SOLU 1 | 0.00000 |
| 8  | 1 | FADN C8  | -1.33139 | -0.75188 | 2.00310  | SOLU 1 | 0.00000 |
| 9  | 1 | FADN C9  | -2.41560 | -0.38478 | 1.09534  | SOLU 1 | 0.00000 |
| 10 | 1 | FADN C10 | -3.99735 | -0.97755 | 2.87578  | SOLU 1 | 0.00000 |
| 11 | 1 | FADN H11 | 4.13244  | -2.53453 | 1.56952  | SOLU 1 | 0.00000 |
| 12 | 1 | FADN H12 | 2.43010  | -1.04269 | 0.56485  | SOLU 1 | 0.00000 |
| 13 | 1 | FADN H13 | 1.46219  | -3.48651 | 4.82012  | SOLU 1 | 0.00000 |
| 14 | 1 | FADN H14 | 3.64231  | -3.75492 | 3.69171  | SOLU 1 | 0.00000 |
| 15 | 1 | FADN O15 | -2.22953 | -0.01094 | -0.09174 | SOLU 1 | 0.00000 |
| 16 | 1 | FADN O16 | -5.16310 | -1.03703 | 3.30718  | SOLU 1 | 0.00000 |
| 17 | 1 | FADN N17 | -3.71482 | -0.48733 | 1.58797  | SOLU 1 | 0.00000 |
| 18 | 1 | FADN H18 | -4.49145 | -0.19960 | 1.03054  | SOLU 1 | 0.00000 |
| 19 | 1 | FADN N19 | -2.92729 | -1.42042 | 3.68455  | SOLU 1 | 0.00000 |
| 20 | 1 | FADN H20 | -3.16331 | -1.81913 | 4.56946  | SOLU 1 | 0.00000 |
| 21 | 1 | FADN N21 | -0.57376 | -1.91274 | 4.00324  | SOLU 1 | 0.00000 |
| 22 | 1 | FADN N22 | 0.01016  | -0.44906 | 1.62764  | SOLU 1 | 0.00000 |
| 23 | 1 | FADN C23 | -0.65218 | -1.93003 | 5.44151  | SOLU 1 | 0.00000 |
| 24 | 1 | FADN H24 | -1.22176 | -1.04230 | 5.82883  | SOLU 1 | 0.00000 |
| 25 | 1 | FADN H25 | -1.16610 | -2.87357 | 5.77172  | SOLU 1 | 0.00000 |
| 26 | 1 | FADN H26 | 0.37847  | -1.90155 | 5.88683  | SOLU 1 | 0.00000 |
| 27 | 1 | FADN H27 | 0.02967  | -0.31064 | 0.63257  | SOLU 1 | 0.00000 |
| 28 | 1 | FADN C28 | 0.06277  | 0.05550  | -1.93090 | SOLU 1 | 0.00000 |
| 29 | 1 | FADN H29 | 0.98992  | -0.54320 | -1.81619 | SOLU 1 | 0.00000 |
| 30 | 1 | FADN H30 | -0.06911 | 0.96285  | -1.29964 | SOLU 1 | 0.00000 |
| 31 | 1 | FADN N31 | -0.85930 | -0.29262 | -2.77739 | SOLU 1 | 0.00000 |
| 32 | 1 | FADN C32 | -0.74672 | -1.48096 | -3.61269 | SOLU 1 | 0.00000 |
| 33 | 1 | FADN H33 | 0.22863  | -2.00683 | -3.43290 | SOLU 1 | 0.00000 |
| 34 | 1 | FADN H34 | -1.59709 | -2.17643 | -3.36955 | SOLU 1 | 0.00000 |
| 35 | 1 | FADN H35 | -0.81451 | -1.17570 | -4.69304 | SOLU 1 | 0.00000 |
| 36 | 1 | FADN C36 | -2.09775 | 0.46196  | -2.94109 | SOLU 1 | 0.00000 |
| 37 | 1 | FADN H37 | -2.95721 | -0.18974 | -2.61983 | SOLU 1 | 0.00000 |
| 38 | 1 | FADN H38 | -2.08952 | 1.38081  | -2.29423 | SOLU 1 | 0.00000 |
| 39 | 1 | FADN H39 | -2.20974 | 0.74609  | -4.02171 | SOLU 1 | 0.00000 |

**S1.3** AM1-MOVb optimized structures using the geometric reaction coordinate  $R_c = R[C-H] - R[H-N]$

(red points in Figure 1 of main text, and also Figures 2-4). The *optimized* parameters ( $\alpha_{CH}$ ,  $\alpha_{HN}$ ,  $\Delta\varepsilon$ , and  $\gamma_{rp}$ ) are here employed.

```
* #####
* # MOV B RXNC (Geometry Driven) - REACTANT IN-PLANE #
* #####
*
```

| 39 |   |          |          |          |                 |         |
|----|---|----------|----------|----------|-----------------|---------|
| 1  | 1 | FADN C1  | 0.03448  | -0.25064 | 0.10805 SOLU 1  | 0.00000 |
| 2  | 1 | FADN C2  | 0.08655  | -0.34689 | 1.48385 SOLU 1  | 0.00000 |
| 3  | 1 | FADN C3  | 1.33414  | -0.22307 | 2.16259 SOLU 1  | 0.00000 |
| 4  | 1 | FADN C4  | 2.53799  | -0.03005 | 1.39057 SOLU 1  | 0.00000 |
| 5  | 1 | FADN C5  | 2.43811  | 0.09449  | -0.01386 SOLU 1 | 0.00000 |
| 6  | 1 | FADN C6  | 1.20354  | -0.01919 | -0.63412 SOLU 1 | 0.00000 |
| 7  | 1 | FADN C7  | 3.78638  | 0.07644  | 3.44435 SOLU 1  | 0.00000 |
| 8  | 1 | FADN C8  | 2.50459  | -0.11950 | 4.16471 SOLU 1  | 0.00000 |
| 9  | 1 | FADN C9  | 2.52581  | -0.14623 | 5.67082 SOLU 1  | 0.00000 |
| 10 | 1 | FADN C10 | 4.95855  | 0.26304  | 5.60344 SOLU 1  | 0.00000 |
| 11 | 1 | FADN H11 | -0.93482 | -0.34598 | -0.41317 SOLU 1 | 0.00000 |
| 12 | 1 | FADN H12 | -0.83791 | -0.50983 | 2.07263 SOLU 1  | 0.00000 |
| 13 | 1 | FADN H13 | 3.32116  | 0.30237  | -0.63955 SOLU 1 | 0.00000 |
| 14 | 1 | FADN H14 | 1.13954  | 0.08000  | -1.73293 SOLU 1 | 0.00000 |
| 15 | 1 | FADN O15 | 1.52376  | -0.32767 | 6.36258 SOLU 1  | 0.00000 |
| 16 | 1 | FADN O16 | 6.05504  | 0.44531  | 6.14724 SOLU 1  | 0.00000 |
| 17 | 1 | FADN N17 | 3.76776  | 0.04961  | 6.28767 SOLU 1  | 0.00000 |
| 18 | 1 | FADN H18 | 3.81446  | 0.04165  | 7.29184 SOLU 1  | 0.00000 |
| 19 | 1 | FADN N19 | 4.93231  | 0.27697  | 4.16400 SOLU 1  | 0.00000 |
| 20 | 1 | FADN H20 | 5.82196  | 0.44168  | 3.72799 SOLU 1  | 0.00000 |
| 21 | 1 | FADN N21 | 3.77474  | 0.04176  | 2.06816 SOLU 1  | 0.00000 |
| 22 | 1 | FADN N22 | 1.35749  | -0.27707 | 3.54066 SOLU 1  | 0.00000 |
| 23 | 1 | FADN C23 | 5.01631  | 0.08075  | 1.31402 SOLU 1  | 0.00000 |
| 24 | 1 | FADN H24 | 5.35242  | 1.14624  | 1.19132 SOLU 1  | 0.00000 |
| 25 | 1 | FADN H25 | 5.81420  | -0.52132 | 1.82955 SOLU 1  | 0.00000 |
| 26 | 1 | FADN H26 | 4.87117  | -0.38676 | 0.30226 SOLU 1  | 0.00000 |
| 27 | 1 | FADN H27 | -1.61600 | 0.38424  | 4.05691 SOLU 1  | 0.00000 |
| 28 | 1 | FADN C28 | -2.68811 | 0.62222  | 4.24082 SOLU 1  | 0.00000 |
| 29 | 1 | FADN H29 | -2.84593 | 1.71691  | 4.05708 SOLU 1  | 0.00000 |
| 30 | 1 | FADN H30 | -2.92040 | 0.40074  | 5.31783 SOLU 1  | 0.00000 |
| 31 | 1 | FADN N31 | -3.46522 | -0.16010 | 3.30612 SOLU 1  | 0.00000 |
| 32 | 1 | FADN C32 | -4.76633 | 0.40605  | 3.02278 SOLU 1  | 0.00000 |
| 33 | 1 | FADN H33 | -4.63342 | 1.44804  | 2.63028 SOLU 1  | 0.00000 |
| 34 | 1 | FADN H34 | -5.26798 | -0.21396 | 2.23417 SOLU 1  | 0.00000 |
| 35 | 1 | FADN H35 | -5.43706 | 0.44599  | 3.92401 SOLU 1  | 0.00000 |
| 36 | 1 | FADN C36 | -3.53096 | -1.55872 | 3.67247 SOLU 1  | 0.00000 |
| 37 | 1 | FADN H37 | -4.02496 | -2.12871 | 2.84274 SOLU 1  | 0.00000 |
| 38 | 1 | FADN H38 | -2.48839 | -1.94783 | 3.81086 SOLU 1  | 0.00000 |
| 39 | 1 | FADN H39 | -4.10515 | -1.74167 | 4.62181 SOLU 1  | 0.00000 |

```
* #####
* # MOV B RXNC (Geometry Driven) - REACTANT BELOW #
* #####
*
```

| 39 |   |         |         |          |                |         |
|----|---|---------|---------|----------|----------------|---------|
| 1  | 1 | FADN C1 | 3.36211 | -1.44157 | 2.65439 SOLU 1 | 0.00000 |
| 2  | 1 | FADN C2 | 2.44899 | -0.44590 | 2.37569 SOLU 1 | 0.00000 |
| 3  | 1 | FADN C3 | 1.06571 | -0.64428 | 2.65616 SOLU 1 | 0.00000 |
| 4  | 1 | FADN C4 | 0.63296 | -1.90533 | 3.20561 SOLU 1 | 0.00000 |



|    |   |          |          |          |          |        |         |
|----|---|----------|----------|----------|----------|--------|---------|
| 5  | 1 | FADN C5  | 1.60370  | -2.88893 | 3.50668  | SOLU 1 | 0.00000 |
| 6  | 1 | FADN C6  | 2.94024  | -2.65262 | 3.22785  | SOLU 1 | 0.00000 |
| 7  | 1 | FADN C7  | -1.61725 | -1.05565 | 3.26703  | SOLU 1 | 0.00000 |
| 8  | 1 | FADN C8  | -1.09124 | 0.21200  | 2.70199  | SOLU 1 | 0.00000 |
| 9  | 1 | FADN C9  | -2.05715 | 1.34212  | 2.45460  | SOLU 1 | 0.00000 |
| 10 | 1 | FADN C10 | -3.86891 | -0.06005 | 3.37230  | SOLU 1 | 0.00000 |
| 11 | 1 | FADN H11 | 4.43334  | -1.28674 | 2.43481  | SOLU 1 | 0.00000 |
| 12 | 1 | FADN H12 | 2.77534  | 0.51713  | 1.93982  | SOLU 1 | 0.00000 |
| 13 | 1 | FADN H13 | 1.32942  | -3.84496 | 3.98158  | SOLU 1 | 0.00000 |
| 14 | 1 | FADN H14 | 3.68852  | -3.43027 | 3.46643  | SOLU 1 | 0.00000 |
| 15 | 1 | FADN O15 | -1.72873 | 2.42170  | 1.96317  | SOLU 1 | 0.00000 |
| 16 | 1 | FADN O16 | -5.04644 | -0.25553 | 3.69757  | SOLU 1 | 0.00000 |
| 17 | 1 | FADN N17 | -3.39216 | 1.12016  | 2.81462  | SOLU 1 | 0.00000 |
| 18 | 1 | FADN H18 | -4.06021 | 1.85713  | 2.66783  | SOLU 1 | 0.00000 |
| 19 | 1 | FADN N19 | -2.94207 | -1.14036 | 3.59433  | SOLU 1 | 0.00000 |
| 20 | 1 | FADN H20 | -3.34559 | -1.96370 | 4.00465  | SOLU 1 | 0.00000 |
| 21 | 1 | FADN N21 | -0.74520 | -2.10788 | 3.43623  | SOLU 1 | 0.00000 |
| 22 | 1 | FADN N22 | 0.17794  | 0.38161  | 2.40456  | SOLU 1 | 0.00000 |
| 23 | 1 | FADN C23 | -1.23232 | -3.41324 | 3.84959  | SOLU 1 | 0.00000 |
| 24 | 1 | FADN H24 | -1.35412 | -3.43639 | 4.96679  | SOLU 1 | 0.00000 |
| 25 | 1 | FADN H25 | -2.21070 | -3.64889 | 3.34706  | SOLU 1 | 0.00000 |
| 26 | 1 | FADN H26 | -0.51276 | -4.21639 | 3.53344  | SOLU 1 | 0.00000 |
| 27 | 1 | FADN H27 | -0.00784 | -0.02111 | -1.71651 | SOLU 1 | 0.00000 |
| 28 | 1 | FADN C28 | -0.05777 | -0.12942 | -2.82706 | SOLU 1 | 0.00000 |
| 29 | 1 | FADN H29 | 0.97650  | -0.34429 | -3.20427 | SOLU 1 | 0.00000 |
| 30 | 1 | FADN H30 | -0.40856 | 0.84524  | -3.25761 | SOLU 1 | 0.00000 |
| 31 | 1 | FADN N31 | -0.94450 | -1.18220 | -3.24938 | SOLU 1 | 0.00000 |
| 32 | 1 | FADN C32 | -0.50445 | -2.50185 | -2.87085 | SOLU 1 | 0.00000 |
| 33 | 1 | FADN H33 | 0.53760  | -2.66366 | -3.25280 | SOLU 1 | 0.00000 |
| 34 | 1 | FADN H34 | -0.50351 | -2.66534 | -1.75639 | SOLU 1 | 0.00000 |
| 35 | 1 | FADN H35 | -1.18206 | -3.26286 | -3.33955 | SOLU 1 | 0.00000 |
| 36 | 1 | FADN C36 | -2.33352 | -0.92696 | -2.95786 | SOLU 1 | 0.00000 |
| 37 | 1 | FADN H37 | -2.55699 | -0.90804 | -1.85425 | SOLU 1 | 0.00000 |
| 38 | 1 | FADN H38 | -2.62297 | 0.06471  | -3.39465 | SOLU 1 | 0.00000 |
| 39 | 1 | FADN H39 | -2.96029 | -1.72673 | -3.43271 | SOLU 1 | 0.00000 |

```

* #####
* # MOV B,RXNC (Geometry Driven) - TS (Rc = -0.040 ) #
* #####
*

```

|    |   |          |          |          |         |        |         |
|----|---|----------|----------|----------|---------|--------|---------|
| 39 |   |          |          |          |         |        |         |
| 1  | 1 | FADN C1  | 3.26083  | -1.63244 | 1.87056 | SOLU 1 | 0.00000 |
| 2  | 1 | FADN C2  | 2.29780  | -0.76799 | 1.38508 | SOLU 1 | 0.00000 |
| 3  | 1 | FADN C3  | 0.93833  | -0.91005 | 1.77004 | SOLU 1 | 0.00000 |
| 4  | 1 | FADN C4  | 0.57630  | -1.97886 | 2.65724 | SOLU 1 | 0.00000 |
| 5  | 1 | FADN C5  | 1.58866  | -2.83070 | 3.15559 | SOLU 1 | 0.00000 |
| 6  | 1 | FADN C6  | 2.90559  | -2.65753 | 2.75729 | SOLU 1 | 0.00000 |
| 7  | 1 | FADN C7  | -1.66979 | -1.12064 | 2.70808 | SOLU 1 | 0.00000 |
| 8  | 1 | FADN C8  | -1.25911 | -0.08825 | 1.78212 | SOLU 1 | 0.00000 |
| 9  | 1 | FADN C9  | -2.26576 | 0.91175  | 1.32546 | SOLU 1 | 0.00000 |
| 10 | 1 | FADN C10 | -3.86192 | -0.02827 | 2.94367 | SOLU 1 | 0.00000 |
| 11 | 1 | FADN H11 | 4.31538  | -1.50946 | 1.57025 | SOLU 1 | 0.00000 |
| 12 | 1 | FADN H12 | 2.58128  | 0.05350  | 0.70352 | SOLU 1 | 0.00000 |
| 13 | 1 | FADN H13 | 1.36112  | -3.63092 | 3.87870 | SOLU 1 | 0.00000 |
| 14 | 1 | FADN H14 | 3.68518  | -3.33102 | 3.15440 | SOLU 1 | 0.00000 |
| 15 | 1 | FADN O15 | -2.08038 | 1.69792  | 0.38677 | SOLU 1 | 0.00000 |
| 16 | 1 | FADN O16 | -4.95364 | -0.03120 | 3.53187 | SOLU 1 | 0.00000 |

|    |   |          |          |          |          |        |         |
|----|---|----------|----------|----------|----------|--------|---------|
| 17 | 1 | FADN N17 | -3.50176 | 0.91522  | 1.98429  | SOLU 1 | 0.00000 |
| 18 | 1 | FADN H18 | -4.17559 | 1.62366  | 1.76011  | SOLU 1 | 0.00000 |
| 19 | 1 | FADN N19 | -2.93006 | -1.06588 | 3.26375  | SOLU 1 | 0.00000 |
| 20 | 1 | FADN H20 | -3.23584 | -1.71631 | 3.96235  | SOLU 1 | 0.00000 |
| 21 | 1 | FADN N21 | -0.77553 | -2.12811 | 3.03805  | SOLU 1 | 0.00000 |
| 22 | 1 | FADN N22 | 0.01140  | 0.03569  | 1.30885  | SOLU 1 | 0.00000 |
| 23 | 1 | FADN C23 | -1.18151 | -3.25308 | 3.85400  | SOLU 1 | 0.00000 |
| 24 | 1 | FADN H24 | -1.10667 | -2.99349 | 4.94512  | SOLU 1 | 0.00000 |
| 25 | 1 | FADN H25 | -2.23254 | -3.56447 | 3.60475  | SOLU 1 | 0.00000 |
| 26 | 1 | FADN H26 | -0.52474 | -4.13873 | 3.63520  | SOLU 1 | 0.00000 |
| 27 | 1 | FADN H27 | 0.00689  | 0.01387  | -0.00340 | SOLU 1 | 0.00000 |
| 28 | 1 | FADN C28 | 0.00478  | -0.00096 | -1.27566 | SOLU 1 | 0.00000 |
| 29 | 1 | FADN H29 | 1.09819  | -0.16526 | -1.44854 | SOLU 1 | 0.00000 |
| 30 | 1 | FADN H30 | -0.35203 | 1.04736  | -1.45262 | SOLU 1 | 0.00000 |
| 31 | 1 | FADN N31 | -0.81179 | -0.98426 | -1.76192 | SOLU 1 | 0.00000 |
| 32 | 1 | FADN C32 | -0.33791 | -2.32478 | -1.95992 | SOLU 1 | 0.00000 |
| 33 | 1 | FADN H33 | 0.78368  | -2.35551 | -1.95242 | SOLU 1 | 0.00000 |
| 34 | 1 | FADN H34 | -0.72533 | -3.00214 | -1.14855 | SOLU 1 | 0.00000 |
| 35 | 1 | FADN H35 | -0.70614 | -2.71400 | -2.94891 | SOLU 1 | 0.00000 |
| 36 | 1 | FADN C36 | -2.19806 | -0.73716 | -2.04914 | SOLU 1 | 0.00000 |
| 37 | 1 | FADN H37 | -2.84768 | -1.41651 | -1.43121 | SOLU 1 | 0.00000 |
| 38 | 1 | FADN H38 | -2.46635 | 0.33000  | -1.82570 | SOLU 1 | 0.00000 |
| 39 | 1 | FADN H39 | -2.40243 | -0.94598 | -3.13573 | SOLU 1 | 0.00000 |

\* #####  
 \* # MOV B RXNC (Geometry Driven) - PRODUCT #  
 \* #####  
 \*

|    |   |          |          |          |          |        |         |
|----|---|----------|----------|----------|----------|--------|---------|
| 39 |   |          |          |          |          |        |         |
| 1  | 1 | FADN C1  | 3.16009  | -2.36854 | 2.02644  | SOLU 1 | 0.00000 |
| 2  | 1 | FADN C2  | 2.19138  | -1.54097 | 1.46262  | SOLU 1 | 0.00000 |
| 3  | 1 | FADN C3  | 0.94502  | -1.37139 | 2.08732  | SOLU 1 | 0.00000 |
| 4  | 1 | FADN C4  | 0.68084  | -2.06480 | 3.31433  | SOLU 1 | 0.00000 |
| 5  | 1 | FADN C5  | 1.66429  | -2.91354 | 3.84634  | SOLU 1 | 0.00000 |
| 6  | 1 | FADN C6  | 2.89476  | -3.05562 | 3.20581  | SOLU 1 | 0.00000 |
| 7  | 1 | FADN C7  | -1.61440 | -1.34996 | 3.21450  | SOLU 1 | 0.00000 |
| 8  | 1 | FADN C8  | -1.34908 | -0.75160 | 1.97057  | SOLU 1 | 0.00000 |
| 9  | 1 | FADN C9  | -2.44410 | -0.35522 | 1.08653  | SOLU 1 | 0.00000 |
| 10 | 1 | FADN C10 | -4.00761 | -0.95250 | 2.88130  | SOLU 1 | 0.00000 |
| 11 | 1 | FADN H11 | 4.13884  | -2.47621 | 1.53358  | SOLU 1 | 0.00000 |
| 12 | 1 | FADN H12 | 2.41975  | -0.99775 | 0.53395  | SOLU 1 | 0.00000 |
| 13 | 1 | FADN H13 | 1.47390  | -3.48143 | 4.77152  | SOLU 1 | 0.00000 |
| 14 | 1 | FADN H14 | 3.65716  | -3.71872 | 3.64411  | SOLU 1 | 0.00000 |
| 15 | 1 | FADN O15 | -2.27183 | 0.03628  | -0.09598 | SOLU 1 | 0.00000 |
| 16 | 1 | FADN O16 | -5.16614 | -1.00249 | 3.33202  | SOLU 1 | 0.00000 |
| 17 | 1 | FADN N17 | -3.73727 | -0.44888 | 1.59693  | SOLU 1 | 0.00000 |
| 18 | 1 | FADN H18 | -4.51781 | -0.14279 | 1.05442  | SOLU 1 | 0.00000 |
| 19 | 1 | FADN N19 | -2.93098 | -1.42258 | 3.66662  | SOLU 1 | 0.00000 |
| 20 | 1 | FADN H20 | -3.15928 | -1.82500 | 4.55206  | SOLU 1 | 0.00000 |
| 21 | 1 | FADN N21 | -0.57784 | -1.92137 | 3.96188  | SOLU 1 | 0.00000 |
| 22 | 1 | FADN N22 | -0.01479 | -0.46224 | 1.57498  | SOLU 1 | 0.00000 |
| 23 | 1 | FADN C23 | -0.65930 | -1.97321 | 5.39942  | SOLU 1 | 0.00000 |
| 24 | 1 | FADN H24 | -1.23380 | -1.09706 | 5.80581  | SOLU 1 | 0.00000 |
| 25 | 1 | FADN H25 | -1.16847 | -2.92647 | 5.70820  | SOLU 1 | 0.00000 |
| 26 | 1 | FADN H26 | 0.36997  | -1.94809 | 5.84801  | SOLU 1 | 0.00000 |
| 27 | 1 | FADN H27 | 0.01026  | -0.32359 | 0.58230  | SOLU 1 | 0.00000 |
| 28 | 1 | FADN C28 | 0.05986  | 0.02508  | -1.83880 | SOLU 1 | 0.00000 |

|    |   |          |          |          |          |        |         |
|----|---|----------|----------|----------|----------|--------|---------|
| 29 | 1 | FADN H29 | 0.96179  | -0.60012 | -1.67721 | SOLU 1 | 0.00000 |
| 30 | 1 | FADN H30 | -0.05782 | 0.96123  | -1.24861 | SOLU 1 | 0.00000 |
| 31 | 1 | FADN N31 | -0.84588 | -0.32030 | -2.70582 | SOLU 1 | 0.00000 |
| 32 | 1 | FADN C32 | -0.74845 | -1.54000 | -3.49556 | SOLU 1 | 0.00000 |
| 33 | 1 | FADN H33 | 0.20434  | -2.08929 | -3.27045 | SOLU 1 | 0.00000 |
| 34 | 1 | FADN H34 | -1.62684 | -2.20033 | -3.25434 | SOLU 1 | 0.00000 |
| 35 | 1 | FADN H35 | -0.77694 | -1.27068 | -4.58721 | SOLU 1 | 0.00000 |
| 36 | 1 | FADN C36 | -2.04903 | 0.47152  | -2.93809 | SOLU 1 | 0.00000 |
| 37 | 1 | FADN H37 | -2.94417 | -0.14436 | -2.64505 | SOLU 1 | 0.00000 |
| 38 | 1 | FADN H38 | -2.03739 | 1.40190  | -2.30796 | SOLU 1 | 0.00000 |
| 39 | 1 | FADN H39 | -2.10354 | 0.73862  | -4.02760 | SOLU 1 | 0.00000 |

\* #####  
 \* # MOVB RXNC UNSCALED (Geom. Driv.) - REACTANT IN-PLANE #  
 \* #####  
 \*

|    |   |          |          |          |          |        |         |
|----|---|----------|----------|----------|----------|--------|---------|
| 39 |   |          |          |          |          |        |         |
| 1  | 1 | FADN C1  | 0.06975  | -0.28545 | 0.08810  | SOLU 1 | 0.00000 |
| 2  | 1 | FADN C2  | 0.11715  | -0.38614 | 1.46371  | SOLU 1 | 0.00000 |
| 3  | 1 | FADN C3  | 1.36004  | -0.24914 | 2.14856  | SOLU 1 | 0.00000 |
| 4  | 1 | FADN C4  | 2.56486  | -0.03976 | 1.38239  | SOLU 1 | 0.00000 |
| 5  | 1 | FADN C5  | 2.46956  | 0.08856  | -0.02211 | SOLU 1 | 0.00000 |
| 6  | 1 | FADN C6  | 1.23919  | -0.03724 | -0.64818 | SOLU 1 | 0.00000 |
| 7  | 1 | FADN C7  | 3.80343  | 0.07460  | 3.44178  | SOLU 1 | 0.00000 |
| 8  | 1 | FADN C8  | 2.52068  | -0.13724 | 4.15613  | SOLU 1 | 0.00000 |
| 9  | 1 | FADN C9  | 2.53554  | -0.16710 | 5.66237  | SOLU 1 | 0.00000 |
| 10 | 1 | FADN C10 | 4.96420  | 0.26713  | 5.60658  | SOLU 1 | 0.00000 |
| 11 | 1 | FADN H11 | -0.89611 | -0.39042 | -0.43777 | SOLU 1 | 0.00000 |
| 12 | 1 | FADN H12 | -0.80800 | -0.56383 | 2.04609  | SOLU 1 | 0.00000 |
| 13 | 1 | FADN H13 | 3.35288  | 0.30882  | -0.64322 | SOLU 1 | 0.00000 |
| 14 | 1 | FADN H14 | 1.17853  | 0.06532  | -1.74691 | SOLU 1 | 0.00000 |
| 15 | 1 | FADN O15 | 1.53196  | -0.35971 | 6.34889  | SOLU 1 | 0.00000 |
| 16 | 1 | FADN O16 | 6.05634  | 0.45912  | 6.15555  | SOLU 1 | 0.00000 |
| 17 | 1 | FADN N17 | 3.77274  | 0.03924  | 6.28507  | SOLU 1 | 0.00000 |
| 18 | 1 | FADN H18 | 3.81522  | 0.02881  | 7.28945  | SOLU 1 | 0.00000 |
| 19 | 1 | FADN N19 | 4.94396  | 0.28525  | 4.16697  | SOLU 1 | 0.00000 |
| 20 | 1 | FADN H20 | 5.83372  | 0.46072  | 3.73531  | SOLU 1 | 0.00000 |
| 21 | 1 | FADN N21 | 3.79786  | 0.04393  | 2.06547  | SOLU 1 | 0.00000 |
| 22 | 1 | FADN N22 | 1.37836  | -0.30617 | 3.52667  | SOLU 1 | 0.00000 |
| 23 | 1 | FADN C23 | 5.04227  | 0.09869  | 1.31693  | SOLU 1 | 0.00000 |
| 24 | 1 | FADN H24 | 5.36828  | 1.16802  | 1.20051  | SOLU 1 | 0.00000 |
| 25 | 1 | FADN H25 | 5.84375  | -0.49776 | 1.83349  | SOLU 1 | 0.00000 |
| 26 | 1 | FADN H26 | 4.90639  | -0.36570 | 0.30246  | SOLU 1 | 0.00000 |
| 27 | 1 | FADN H27 | -1.65017 | 0.39811  | 4.05192  | SOLU 1 | 0.00000 |
| 28 | 1 | FADN C28 | -2.73093 | 0.64883  | 4.23651  | SOLU 1 | 0.00000 |
| 29 | 1 | FADN H29 | -2.88204 | 1.74214  | 4.04121  | SOLU 1 | 0.00000 |
| 30 | 1 | FADN H30 | -2.97182 | 0.44270  | 5.31417  | SOLU 1 | 0.00000 |
| 31 | 1 | FADN N31 | -3.51823 | -0.13296 | 3.30671  | SOLU 1 | 0.00000 |
| 32 | 1 | FADN C32 | -4.84120 | 0.41005  | 3.08355  | SOLU 1 | 0.00000 |
| 33 | 1 | FADN H33 | -4.74437 | 1.46247  | 2.70883  | SOLU 1 | 0.00000 |
| 34 | 1 | FADN H34 | -5.35852 | -0.20420 | 2.30075  | SOLU 1 | 0.00000 |
| 35 | 1 | FADN H35 | -5.47907 | 0.41752  | 4.00917  | SOLU 1 | 0.00000 |
| 36 | 1 | FADN C36 | -3.54609 | -1.53807 | 3.65380  | SOLU 1 | 0.00000 |
| 37 | 1 | FADN H37 | -4.06023 | -2.10444 | 2.83390  | SOLU 1 | 0.00000 |
| 38 | 1 | FADN H38 | -2.49296 | -1.91104 | 3.74800  | SOLU 1 | 0.00000 |
| 39 | 1 | FADN H39 | -4.08167 | -1.74622 | 4.62042  | SOLU 1 | 0.00000 |

**S1.4 AM1-MOV B optimized structures using the geometric reaction coordinate  $R_c = R[C-H] - R[H-N]$ .  
All the parameters ( $\alpha_{CH}$ ,  $\alpha_{HN}$ ,  $\Delta\epsilon$ , and  $\gamma_{rp}$ ) were set to zero.**

```
* #####
* # MOV B RXNC UNSCALED (Geom. Driv.) - REACTANT BELOW #
* #####
*
```

| 39 |   |          |          |          |          |        |         |
|----|---|----------|----------|----------|----------|--------|---------|
| 1  | 1 | FADN C1  | 3.36235  | -1.45475 | 2.66791  | SOLU 1 | 0.00000 |
| 2  | 1 | FADN C2  | 2.45044  | -0.45974 | 2.38292  | SOLU 1 | 0.00000 |
| 3  | 1 | FADN C3  | 1.06707  | -0.65420 | 2.66556  | SOLU 1 | 0.00000 |
| 4  | 1 | FADN C4  | 0.63302  | -1.91094 | 3.22361  | SOLU 1 | 0.00000 |
| 5  | 1 | FADN C5  | 1.60234  | -2.89427 | 3.53010  | SOLU 1 | 0.00000 |
| 6  | 1 | FADN C6  | 2.93912  | -2.66154 | 3.24932  | SOLU 1 | 0.00000 |
| 7  | 1 | FADN C7  | -1.61564 | -1.05718 | 3.28370  | SOLU 1 | 0.00000 |
| 8  | 1 | FADN C8  | -1.08853 | 0.20558  | 2.70852  | SOLU 1 | 0.00000 |
| 9  | 1 | FADN C9  | -2.05318 | 1.33527  | 2.45405  | SOLU 1 | 0.00000 |
| 10 | 1 | FADN C10 | -3.86473 | -0.05565 | 3.38881  | SOLU 1 | 0.00000 |
| 11 | 1 | FADN H11 | 4.43372  | -1.30273 | 2.44693  | SOLU 1 | 0.00000 |
| 12 | 1 | FADN H12 | 2.77795  | 0.49991  | 1.94059  | SOLU 1 | 0.00000 |
| 13 | 1 | FADN H13 | 1.32642  | -3.84699 | 4.01072  | SOLU 1 | 0.00000 |
| 14 | 1 | FADN H14 | 3.68655  | -3.43859 | 3.49254  | SOLU 1 | 0.00000 |
| 15 | 1 | FADN O15 | -1.72386 | 2.40982  | 1.95224  | SOLU 1 | 0.00000 |
| 16 | 1 | FADN O16 | -5.04116 | -0.24563 | 3.72105  | SOLU 1 | 0.00000 |
| 17 | 1 | FADN N17 | -3.38759 | 1.11879  | 2.81927  | SOLU 1 | 0.00000 |
| 18 | 1 | FADN H18 | -4.05472 | 1.85579  | 2.66818  | SOLU 1 | 0.00000 |
| 19 | 1 | FADN N19 | -2.93960 | -1.13656 | 3.61539  | SOLU 1 | 0.00000 |
| 20 | 1 | FADN H20 | -3.34388 | -1.95584 | 4.03309  | SOLU 1 | 0.00000 |
| 21 | 1 | FADN N21 | -0.74522 | -2.11001 | 3.45703  | SOLU 1 | 0.00000 |
| 22 | 1 | FADN N22 | 0.18039  | 0.37115  | 2.40785  | SOLU 1 | 0.00000 |
| 23 | 1 | FADN C23 | -1.23208 | -3.41286 | 3.87854  | SOLU 1 | 0.00000 |
| 24 | 1 | FADN H24 | -1.33943 | -3.43391 | 4.99725  | SOLU 1 | 0.00000 |
| 25 | 1 | FADN H25 | -2.21751 | -3.64639 | 3.38917  | SOLU 1 | 0.00000 |
| 26 | 1 | FADN H26 | -0.51892 | -4.21853 | 3.55392  | SOLU 1 | 0.00000 |
| 27 | 1 | FADN H27 | -0.00985 | -0.00525 | -1.71809 | SOLU 1 | 0.00000 |
| 28 | 1 | FADN C28 | -0.06157 | -0.10769 | -2.84161 | SOLU 1 | 0.00000 |
| 29 | 1 | FADN H29 | 0.97338  | -0.30543 | -3.22532 | SOLU 1 | 0.00000 |
| 30 | 1 | FADN H30 | -0.42475 | 0.86394  | -3.26757 | SOLU 1 | 0.00000 |
| 31 | 1 | FADN N31 | -0.93484 | -1.16975 | -3.27605 | SOLU 1 | 0.00000 |
| 32 | 1 | FADN C32 | -0.48180 | -2.48392 | -2.89315 | SOLU 1 | 0.00000 |
| 33 | 1 | FADN H33 | 0.56706  | -2.63112 | -3.26209 | SOLU 1 | 0.00000 |
| 34 | 1 | FADN H34 | -0.49300 | -2.65024 | -1.77933 | SOLU 1 | 0.00000 |
| 35 | 1 | FADN H35 | -1.14305 | -3.25283 | -3.37209 | SOLU 1 | 0.00000 |
| 36 | 1 | FADN C36 | -2.32713 | -0.93041 | -2.98577 | SOLU 1 | 0.00000 |
| 37 | 1 | FADN H37 | -2.55456 | -0.92154 | -1.88302 | SOLU 1 | 0.00000 |
| 38 | 1 | FADN H38 | -2.62557 | 0.06104  | -3.41698 | SOLU 1 | 0.00000 |
| 39 | 1 | FADN H39 | -2.94425 | -1.73317 | -3.46813 | SOLU 1 | 0.00000 |

```
* #####
* # MOV B RXNC UNSCALED (Geom. Driv.) - TS (Rc = 0.040 ) #
* #####
*
```

| 39 |   |         |         |          |         |        |         |
|----|---|---------|---------|----------|---------|--------|---------|
| 1  | 1 | FADN C1 | 3.26925 | -1.61674 | 1.93547 | SOLU 1 | 0.00000 |
| 2  | 1 | FADN C2 | 2.32008 | -0.71182 | 1.50415 | SOLU 1 | 0.00000 |
| 3  | 1 | FADN C3 | 0.96010 | -0.84916 | 1.89786 | SOLU 1 | 0.00000 |
| 4  | 1 | FADN C4 | 0.58439 | -1.96235 | 2.72433 | SOLU 1 | 0.00000 |

|    |   |          |          |          |          |        |         |
|----|---|----------|----------|----------|----------|--------|---------|
| 5  | 1 | FADN C5  | 1.58760  | -2.85261 | 3.17499  | SOLU 1 | 0.00000 |
| 6  | 1 | FADN C6  | 2.90293  | -2.67839 | 2.77624  | SOLU 1 | 0.00000 |
| 7  | 1 | FADN C7  | -1.66395 | -1.10993 | 2.77135  | SOLU 1 | 0.00000 |
| 8  | 1 | FADN C8  | -1.21767 | -0.01611 | 1.91344  | SOLU 1 | 0.00000 |
| 9  | 1 | FADN C9  | -2.22263 | 0.99481  | 1.46133  | SOLU 1 | 0.00000 |
| 10 | 1 | FADN C10 | -3.88334 | -0.05879 | 2.94484  | SOLU 1 | 0.00000 |
| 11 | 1 | FADN H11 | 4.32272  | -1.50317 | 1.62772  | SOLU 1 | 0.00000 |
| 12 | 1 | FADN H12 | 2.60452  | 0.13446  | 0.85251  | SOLU 1 | 0.00000 |
| 13 | 1 | FADN H13 | 1.35430  | -3.68378 | 3.85962  | SOLU 1 | 0.00000 |
| 14 | 1 | FADN H14 | 3.67505  | -3.38306 | 3.13228  | SOLU 1 | 0.00000 |
| 15 | 1 | FADN O15 | -2.00911 | 1.84199  | 0.58850  | SOLU 1 | 0.00000 |
| 16 | 1 | FADN O16 | -5.00251 | -0.11774 | 3.47428  | SOLU 1 | 0.00000 |
| 17 | 1 | FADN N17 | -3.49135 | 0.93752  | 2.05757  | SOLU 1 | 0.00000 |
| 18 | 1 | FADN H18 | -4.16947 | 1.64146  | 1.83121  | SOLU 1 | 0.00000 |
| 19 | 1 | FADN N19 | -2.94602 | -1.09556 | 3.26689  | SOLU 1 | 0.00000 |
| 20 | 1 | FADN H20 | -3.27965 | -1.78310 | 3.91619  | SOLU 1 | 0.00000 |
| 21 | 1 | FADN N21 | -0.76953 | -2.11283 | 3.09546  | SOLU 1 | 0.00000 |
| 22 | 1 | FADN N22 | 0.04785  | 0.12458  | 1.48634  | SOLU 1 | 0.00000 |
| 23 | 1 | FADN C23 | -1.18618 | -3.26607 | 3.86956  | SOLU 1 | 0.00000 |
| 24 | 1 | FADN H24 | -1.13137 | -3.03132 | 4.96729  | SOLU 1 | 0.00000 |
| 25 | 1 | FADN H25 | -2.23032 | -3.57808 | 3.59399  | SOLU 1 | 0.00000 |
| 26 | 1 | FADN H26 | -0.52263 | -4.14358 | 3.63985  | SOLU 1 | 0.00000 |
| 27 | 1 | FADN H27 | 0.03126  | 0.05700  | -0.00209 | SOLU 1 | 0.00000 |
| 28 | 1 | FADN C28 | 0.01695  | -0.00177 | -1.53070 | SOLU 1 | 0.00000 |
| 29 | 1 | FADN H29 | 1.10567  | -0.18033 | -1.64979 | SOLU 1 | 0.00000 |
| 30 | 1 | FADN H30 | -0.33899 | 1.04162  | -1.67160 | SOLU 1 | 0.00000 |
| 31 | 1 | FADN N31 | -0.80991 | -0.99235 | -1.96750 | SOLU 1 | 0.00000 |
| 32 | 1 | FADN C32 | -0.35681 | -2.35231 | -2.05565 | SOLU 1 | 0.00000 |
| 33 | 1 | FADN H33 | 0.75823  | -2.38675 | -2.17737 | SOLU 1 | 0.00000 |
| 34 | 1 | FADN H34 | -0.63817 | -2.92821 | -1.13096 | SOLU 1 | 0.00000 |
| 35 | 1 | FADN H35 | -0.83484 | -2.84886 | -2.94312 | SOLU 1 | 0.00000 |
| 36 | 1 | FADN C36 | -2.21908 | -0.76497 | -2.13842 | SOLU 1 | 0.00000 |
| 37 | 1 | FADN H37 | -2.80699 | -1.33594 | -1.36841 | SOLU 1 | 0.00000 |
| 38 | 1 | FADN H38 | -2.45754 | 0.32757  | -2.04180 | SOLU 1 | 0.00000 |
| 39 | 1 | FADN H39 | -2.53251 | -1.11947 | -3.15823 | SOLU 1 | 0.00000 |

```

* #####
* # MOVB RXNC UNSCALED (Geom. Driv.) - PRODUCT #
* #####
*

```

|    |   |          |          |          |          |        |         |
|----|---|----------|----------|----------|----------|--------|---------|
| 39 |   |          |          |          |          |        |         |
| 1  | 1 | FADN C1  | 3.18547  | -2.40942 | 2.16906  | SOLU 1 | 0.00000 |
| 2  | 1 | FADN C2  | 2.23322  | -1.57205 | 1.59036  | SOLU 1 | 0.00000 |
| 3  | 1 | FADN C3  | 0.98450  | -1.38370 | 2.20114  | SOLU 1 | 0.00000 |
| 4  | 1 | FADN C4  | 0.69357  | -2.07326 | 3.42349  | SOLU 1 | 0.00000 |
| 5  | 1 | FADN C5  | 1.65965  | -2.93224 | 3.97024  | SOLU 1 | 0.00000 |
| 6  | 1 | FADN C6  | 2.89763  | -3.08879 | 3.34714  | SOLU 1 | 0.00000 |
| 7  | 1 | FADN C7  | -1.59767 | -1.35349 | 3.27782  | SOLU 1 | 0.00000 |
| 8  | 1 | FADN C8  | -1.30462 | -0.76048 | 2.04110  | SOLU 1 | 0.00000 |
| 9  | 1 | FADN C9  | -2.37417 | -0.40206 | 1.11198  | SOLU 1 | 0.00000 |
| 10 | 1 | FADN C10 | -3.98293 | -0.98914 | 2.87076  | SOLU 1 | 0.00000 |
| 11 | 1 | FADN H11 | 4.16812  | -2.52999 | 1.68757  | SOLU 1 | 0.00000 |
| 12 | 1 | FADN H12 | 2.47882  | -1.03703 | 0.66145  | SOLU 1 | 0.00000 |
| 13 | 1 | FADN H13 | 1.44936  | -3.49621 | 4.89335  | SOLU 1 | 0.00000 |
| 14 | 1 | FADN H14 | 3.64682  | -3.75850 | 3.79770  | SOLU 1 | 0.00000 |
| 15 | 1 | FADN O15 | -2.17080 | -0.03851 | -0.07551 | SOLU 1 | 0.00000 |
| 16 | 1 | FADN O16 | -5.15556 | -1.04527 | 3.28426  | SOLU 1 | 0.00000 |

|    |            |          |          |          |        |         |
|----|------------|----------|----------|----------|--------|---------|
| 17 | 1 FADN N17 | -3.68088 | -0.50252 | 1.58582  | SOLU 1 | 0.00000 |
| 18 | 1 FADN H18 | -4.44918 | -0.21710 | 1.01626  | SOLU 1 | 0.00000 |
| 19 | 1 FADN N19 | -2.92606 | -1.43176 | 3.69618  | SOLU 1 | 0.00000 |
| 20 | 1 FADN H20 | -3.17533 | -1.83289 | 4.57620  | SOLU 1 | 0.00000 |
| 21 | 1 FADN N21 | -0.57727 | -1.92620 | 4.04978  | SOLU 1 | 0.00000 |
| 22 | 1 FADN N22 | 0.04202  | -0.45183 | 1.68679  | SOLU 1 | 0.00000 |
| 23 | 1 FADN C23 | -0.67440 | -1.92794 | 5.48727  | SOLU 1 | 0.00000 |
| 24 | 1 FADN H24 | -1.23129 | -1.02572 | 5.85936  | SOLU 1 | 0.00000 |
| 25 | 1 FADN H25 | -1.21195 | -2.85791 | 5.81838  | SOLU 1 | 0.00000 |
| 26 | 1 FADN H26 | 0.35035  | -1.91702 | 5.94640  | SOLU 1 | 0.00000 |
| 27 | 1 FADN H27 | 0.06466  | -0.32405 | 0.68972  | SOLU 1 | 0.00000 |
| 28 | 1 FADN C28 | 0.10528  | 0.04487  | -2.11841 | SOLU 1 | 0.00000 |
| 29 | 1 FADN H29 | 1.04902  | -0.53901 | -2.11430 | SOLU 1 | 0.00000 |
| 30 | 1 FADN H30 | 0.01281  | 0.91249  | -1.42718 | SOLU 1 | 0.00000 |
| 31 | 1 FADN N31 | -0.88126 | -0.28026 | -2.89835 | SOLU 1 | 0.00000 |
| 32 | 1 FADN C32 | -0.82181 | -1.42525 | -3.79763 | SOLU 1 | 0.00000 |
| 33 | 1 FADN H33 | 0.18089  | -1.92710 | -3.74218 | SOLU 1 | 0.00000 |
| 34 | 1 FADN H34 | -1.62396 | -2.15746 | -3.50354 | SOLU 1 | 0.00000 |
| 35 | 1 FADN H35 | -1.00762 | -1.07422 | -4.84983 | SOLU 1 | 0.00000 |
| 36 | 1 FADN C36 | -2.14001 | 0.45785  | -2.92117 | SOLU 1 | 0.00000 |
| 37 | 1 FADN H37 | -2.95802 | -0.22009 | -2.54982 | SOLU 1 | 0.00000 |
| 38 | 1 FADN H38 | -2.08683 | 1.35266  | -2.24336 | SOLU 1 | 0.00000 |
| 39 | 1 FADN H39 | -2.35287 | 0.77967  | -3.97581 | SOLU 1 | 0.00000 |

## S2.1 B3LYP/6-31+G(d) optimized structures and absolute energies

39

B3LYP/6-31+G(d) REACTANT : E=-968.354103652; N.R.E.=1638.0099683553

|   |           |           |           |
|---|-----------|-----------|-----------|
| C | 0.000000  | 0.000000  | 0.000000  |
| C | 0.000000  | 0.000000  | 1.379664  |
| C | 1.233136  | 0.000000  | 2.083685  |
| C | 2.468809  | -0.015351 | 1.354797  |
| C | 2.446706  | 0.002464  | -0.047463 |
| C | 1.221465  | 0.010400  | -0.704658 |
| C | 3.608399  | 0.058161  | 3.445817  |
| C | 2.333761  | 0.067722  | 4.101718  |
| C | 2.276474  | 0.115836  | 5.603772  |
| C | 4.772448  | 0.208976  | 5.616866  |
| H | -0.939207 | 0.002805  | -0.543685 |
| H | -0.928654 | 0.007699  | 1.944961  |
| H | 3.354545  | 0.035337  | -0.636026 |
| H | 1.213695  | 0.030968  | -1.790519 |
| O | 1.250919  | 0.104814  | 6.238959  |
| O | 5.831190  | 0.295378  | 6.188429  |
| N | 3.534247  | 0.172759  | 6.220114  |
| H | 3.538095  | 0.214534  | 7.237537  |
| N | 4.736887  | 0.133398  | 4.193176  |
| H | 5.660027  | 0.217521  | 3.781932  |
| N | 3.657612  | -0.041983 | 2.100716  |
| N | 1.208781  | 0.025442  | 3.439258  |
| C | 4.967212  | -0.174552 | 1.424457  |
| H | 5.413680  | 0.810358  | 1.255986  |
| H | 5.626853  | -0.799600 | 2.028654  |
| H | 4.829834  | -0.684316 | 0.474839  |
| H | -1.432761 | 0.442172  | 4.010650  |
| C | -2.489378 | 0.608864  | 4.239207  |
| H | -2.698820 | 1.678346  | 4.130443  |

|   |           |           |          |
|---|-----------|-----------|----------|
| H | -2.683174 | 0.320093  | 5.288804 |
| N | -3.285209 | -0.148678 | 3.272386 |
| C | -4.693587 | 0.243601  | 3.296718 |
| H | -4.783906 | 1.312473  | 3.077390 |
| H | -5.243902 | -0.310797 | 2.529206 |
| H | -5.173548 | 0.047204  | 4.274723 |
| C | -3.139832 | -1.585858 | 3.489685 |
| H | -3.681177 | -2.136748 | 2.713014 |
| H | -2.081281 | -1.868257 | 3.439332 |
| H | -3.526283 | -1.908750 | 4.476015 |

39

B3LYP/6-31+G(d) TS : E=-968.354103652; N.R.E.=1638.0099683553

|   |           |           |           |
|---|-----------|-----------|-----------|
| C | 0.000000  | 0.000000  | 0.000000  |
| C | 0.000000  | 0.000000  | 1.388200  |
| C | 1.209395  | 0.000000  | 2.103708  |
| C | 2.438484  | 0.011271  | 1.399256  |
| C | 2.431357  | 0.034986  | -0.002726 |
| C | 1.219649  | 0.021208  | -0.690982 |
| C | 3.568266  | 0.268037  | 3.484621  |
| C | 2.336429  | 0.238985  | 4.150936  |
| C | 2.285380  | 0.444472  | 5.601363  |
| C | 4.746703  | 0.836444  | 5.572987  |
| H | -0.937979 | 0.003330  | -0.546148 |
| H | -0.928078 | 0.017596  | 1.952093  |
| H | 3.354366  | 0.082275  | -0.567842 |
| H | 1.229834  | 0.042852  | -1.776418 |
| O | 1.270617  | 0.342172  | 6.274651  |
| O | 5.785795  | 1.134547  | 6.119271  |
| N | 3.523542  | 0.722636  | 6.200153  |
| H | 3.516366  | 0.908391  | 7.199714  |
| N | 4.705477  | 0.561488  | 4.188528  |
| H | 5.584044  | 0.758090  | 3.724161  |
| N | 3.642969  | 0.039947  | 2.144148  |
| N | 1.150739  | 0.005396  | 3.504270  |
| C | 4.937844  | -0.082491 | 1.459590  |
| H | 5.286128  | 0.884424  | 1.079103  |
| H | 5.678125  | -0.507169 | 2.139552  |
| H | 4.835119  | -0.780849 | 0.629284  |
| H | 0.681884  | -1.120891 | 3.912917  |
| C | 0.190837  | -2.300489 | 4.340908  |
| H | -0.049224 | -2.754477 | 3.375729  |
| H | -0.657081 | -1.873323 | 4.880580  |
| N | 1.072134  | -2.997360 | 5.109914  |
| C | 1.912147  | -4.047660 | 4.543775  |
| H | 1.884148  | -4.002397 | 3.453373  |
| H | 2.946934  | -3.932188 | 4.883721  |
| H | 1.554138  | -5.035034 | 4.867046  |
| C | 1.048033  | -2.872498 | 6.566071  |
| H | 2.048253  | -3.060027 | 6.966240  |
| H | 0.734286  | -1.863933 | 6.845987  |
| H | 0.355509  | -3.607633 | 6.999161  |

39

B3LYP/6-31+G(d) PRODUCT : E=-968.360772060; N.R.E.=1634.8734055169

|   |          |          |          |
|---|----------|----------|----------|
| C | 0.000000 | 0.000000 | 0.000000 |
| C | 0.000000 | 0.000000 | 1.399812 |

|   |           |           |           |
|---|-----------|-----------|-----------|
| C | 1.199629  | 0.000000  | 2.108637  |
| C | 2.426049  | 0.009171  | 1.403333  |
| C | 2.418079  | 0.039013  | 0.009981  |
| C | 1.205694  | 0.023449  | -0.694098 |
| C | 3.606322  | 0.485729  | 3.429625  |
| C | 2.410352  | 0.504627  | 4.104969  |
| C | 2.289706  | 1.116889  | 5.377703  |
| C | 4.735506  | 1.544448  | 5.333924  |
| H | -0.943457 | -0.017193 | -0.537453 |
| H | -0.939835 | -0.026924 | 1.946816  |
| H | 3.349938  | 0.075396  | -0.543438 |
| H | 1.218900  | 0.031058  | -1.779364 |
| O | 1.199099  | 1.238777  | 5.992772  |
| O | 5.747857  | 1.978229  | 5.850058  |
| N | 3.485305  | 1.567908  | 5.936192  |
| H | 3.450721  | 1.994030  | 6.856246  |
| N | 4.731035  | 0.982013  | 4.051369  |
| H | 5.616337  | 1.055863  | 3.565734  |
| N | 3.655275  | -0.010678 | 2.153238  |
| N | 1.262075  | -0.070202 | 3.513229  |
| C | 4.922024  | -0.279535 | 1.479628  |
| H | 5.313206  | 0.598201  | 0.946625  |
| H | 5.659615  | -0.625969 | 2.207965  |
| H | 4.774393  | -1.089562 | 0.762212  |
| H | 0.479224  | 0.230890  | 4.081047  |
| C | -1.909700 | 1.149692  | 5.813781  |
| H | -2.660528 | 0.934282  | 5.058525  |
| H | -0.836882 | 1.088114  | 5.612091  |
| N | -2.285586 | 1.498252  | 6.990357  |
| C | -3.706695 | 1.620750  | 7.369388  |
| H | -4.342117 | 1.366830  | 6.520662  |
| H | -3.905243 | 0.943824  | 8.204566  |
| H | -3.896237 | 2.649427  | 7.687545  |
| C | -1.299991 | 1.801041  | 8.054750  |
| H | -1.466219 | 1.104994  | 8.881615  |
| H | -0.289590 | 1.695816  | 7.656089  |
| H | -1.476593 | 2.822483  | 8.402639  |

## S2.1 M06-2X/6-31+G(d) optimized structures and absolute energies

39

M062X/6-31+G(d) REACTANT : E=-967.937640973; N.R.E.=1661.6194075564

|   |           |           |           |
|---|-----------|-----------|-----------|
| C | 0.000000  | 0.000000  | 0.000000  |
| C | 0.000000  | 0.000000  | 1.376195  |
| C | 1.236278  | 0.000000  | 2.069201  |
| C | 2.459351  | -0.020554 | 1.339521  |
| C | 2.439202  | -0.005439 | -0.061040 |
| C | 1.215969  | 0.005819  | -0.709692 |
| C | 3.620318  | 0.079933  | 3.403994  |
| C | 2.350599  | 0.095761  | 4.070791  |
| C | 2.305510  | 0.169998  | 5.571097  |
| C | 4.793109  | 0.269615  | 5.557481  |
| H | -0.940822 | 0.005040  | -0.540102 |
| H | -0.935049 | 0.007321  | 1.937711  |
| H | 3.347990  | 0.026817  | -0.648343 |
| H | 1.202324  | 0.026770  | -1.795066 |
| O | 1.287028  | 0.173925  | 6.202003  |



|   |           |           |          |
|---|-----------|-----------|----------|
| O | 5.849045  | 0.374352  | 6.113697 |
| N | 3.564006  | 0.232635  | 6.173144 |
| H | 3.581013  | 0.294369  | 7.189730 |
| N | 4.749839  | 0.168358  | 4.137673 |
| H | 5.669357  | 0.267970  | 3.719919 |
| N | 3.651472  | -0.044738 | 2.072489 |
| N | 1.226887  | 0.038709  | 3.427036 |
| C | 4.942056  | -0.207633 | 1.379752 |
| H | 5.363507  | 0.768553  | 1.124901 |
| H | 5.623313  | -0.774427 | 2.014480 |
| H | 4.783940  | -0.795124 | 0.479279 |
| H | -1.157127 | -0.093906 | 3.984419 |
| C | -2.218821 | -0.152965 | 4.232643 |
| H | -2.590315 | 0.860211  | 4.410420 |
| H | -2.352704 | -0.747665 | 5.152626 |
| N | -2.897347 | -0.731835 | 3.077358 |
| C | -4.344436 | -0.606912 | 3.191491 |
| H | -4.619513 | 0.449203  | 3.257786 |
| H | -4.822889 | -1.033635 | 2.305357 |
| H | -4.736306 | -1.128138 | 4.083517 |
| C | -2.518864 | -2.128186 | 2.925312 |
| H | -2.978052 | -2.544427 | 2.023489 |
| H | -1.428957 | -2.211791 | 2.830507 |
| H | -2.828947 | -2.742247 | 3.790775 |

39

M062X/6-31+G(d) TS : E=-967.909967265; N.R.E.=1782.7586494036

|   |           |           |           |
|---|-----------|-----------|-----------|
| C | 0.000000  | 0.000000  | 0.000000  |
| C | 0.000000  | 0.000000  | 1.384644  |
| C | 1.210321  | 0.000000  | 2.088984  |
| C | 2.431884  | -0.012447 | 1.387578  |
| C | 2.427432  | 0.005992  | -0.011066 |
| C | 1.216082  | 0.007788  | -0.691335 |
| C | 3.573303  | 0.237877  | 3.455173  |
| C | 2.339314  | 0.273552  | 4.116845  |
| C | 2.299838  | 0.397776  | 5.576380  |
| C | 4.766198  | 0.703711  | 5.549597  |
| H | -0.936946 | 0.008074  | -0.546428 |
| H | -0.921174 | 0.021298  | 1.959457  |
| H | 3.350665  | 0.042080  | -0.576935 |
| H | 1.222347  | 0.028215  | -1.776338 |
| O | 1.291915  | 0.282370  | 6.238623  |
| O | 5.809262  | 0.954996  | 6.093566  |
| N | 3.547617  | 0.600222  | 6.179258  |
| H | 3.551610  | 0.759849  | 7.183847  |
| N | 4.717686  | 0.464139  | 4.159393  |
| H | 5.602563  | 0.648842  | 3.700003  |
| N | 3.634581  | -0.008718 | 2.129432  |
| N | 1.155916  | 0.017734  | 3.490790  |
| C | 4.917864  | -0.168190 | 1.441219  |
| H | 5.283275  | 0.788431  | 1.054102  |
| H | 5.647836  | -0.607203 | 2.121865  |
| H | 4.787618  | -0.869356 | 0.617980  |
| H | 0.968386  | -1.188655 | 3.904712  |
| C | 0.781090  | -2.393541 | 4.318118  |
| H | 0.615695  | -2.904753 | 3.365575  |
| H | -0.094480 | -2.268706 | 4.953395  |

|   |          |           |          |
|---|----------|-----------|----------|
| N | 1.948220 | -2.680028 | 4.964439 |
| C | 3.050816 | -3.296820 | 4.245412 |
| H | 2.980314 | -3.052906 | 3.181873 |
| H | 4.001489 | -2.922567 | 4.637808 |
| H | 3.032931 | -4.388712 | 4.362182 |
| C | 2.019681 | -2.692850 | 6.419065 |
| H | 2.990453 | -2.304516 | 6.742816 |
| H | 1.232742 | -2.059813 | 6.831848 |
| H | 1.907655 | -3.718297 | 6.793674 |

39

M062X/6-31+G(d) PRODUCT : E=-967.947404275; N.R.E.=1668.1222007662

|   |           |           |           |
|---|-----------|-----------|-----------|
| C | 0.000000  | 0.000000  | 0.000000  |
| C | 0.000000  | 0.000000  | 1.396386  |
| C | 1.193017  | 0.000000  | 2.104889  |
| C | 2.416054  | 0.018115  | 1.406337  |
| C | 2.412934  | 0.048631  | 0.017010  |
| C | 1.205195  | 0.026828  | -0.687585 |
| C | 3.565817  | 0.560308  | 3.411007  |
| C | 2.375347  | 0.563291  | 4.081357  |
| C | 2.244153  | 1.214996  | 5.332461  |
| C | 4.661816  | 1.731509  | 5.253393  |
| H | -0.941165 | -0.018503 | -0.539665 |
| H | -0.939311 | -0.027464 | 1.944627  |
| H | 3.346965  | 0.092081  | -0.532548 |
| H | 1.220905  | 0.036972  | -1.772065 |
| O | 1.163263  | 1.309594  | 5.947627  |
| O | 5.650123  | 2.224877  | 5.741571  |
| N | 3.416777  | 1.731875  | 5.860883  |
| H | 3.366274  | 2.201026  | 6.760018  |
| N | 4.674278  | 1.113147  | 4.002206  |
| H | 5.551298  | 1.207233  | 3.503732  |
| N | 3.634078  | 0.014072  | 2.159484  |
| N | 1.243657  | -0.074040 | 3.513810  |
| C | 4.904753  | -0.182589 | 1.481698  |
| H | 5.242699  | 0.717045  | 0.950472  |
| H | 5.660460  | -0.493603 | 2.206198  |
| H | 4.793793  | -0.997672 | 0.764751  |
| H | 0.436620  | 0.272152  | 4.023432  |
| C | -1.847478 | 1.251955  | 5.465775  |
| H | -2.591249 | 1.705443  | 4.815384  |
| H | -0.835753 | 1.654245  | 5.565156  |
| N | -2.161489 | 0.207311  | 6.129728  |
| C | -3.496146 | -0.406684 | 6.057643  |
| H | -4.122613 | 0.145456  | 5.358264  |
| H | -3.382381 | -1.442569 | 5.731420  |
| H | -3.937041 | -0.388272 | 7.056742  |
| C | -1.203168 | -0.457428 | 7.035593  |
| H | -1.101247 | -1.495899 | 6.712457  |
| H | -0.242102 | 0.056586  | 6.987793  |
| H | -1.621562 | -0.429400 | 8.044358  |
